# Supplementary material for: Conflicting phylogenetic signals in plastomes of the tribe Laureae (Lauraceae)
Source: PeerJ. 2020 Oct 15;8:e10155. doi: 10.7717/peerj.10155 (PMC7568859; doi:10.7717/peerj.10155)
Supplement: Table S1 [file peerj-08-10155-s001.xlsx]

## Sheet: Sheet1
Species name	Tribe/group	Accession number	Length of plastomes (bp)
Caryodaphnopsis malipoensis	Caryodaphnopsis clade	MF939343	149239
Cassytha filiformis	Cassytha clade	MF686119	114603
Cinnamomum camphora	Cinnamomeae	LC228240	152739
Beilschmiedia pauciflora	Cryptocaryeae	MF939347	157901
Cryptocarya chinensis	Cryptocaryeae	MF939349	157675
Eusideroxylon zwageri	Cryptocaryeae	MF939351	157577
Actinodaphne cupularis	Laureae	LAU00034	152754
Actinodaphne pilosa	Laureae	LAU00035	152775
Actinodaphne trichocarpa	Laureae	MF939342	152739
Laurus azorica	Laureae	LAU00105	153011
Laurus nobilis	Laureae	KY085912	152750
Laurus nobilis	Laureae	LAU00056	152608
Laurus nobilis	Laureae	NC034700	152750
Lindera aggregata	Laureae	LAU00079	152696
Lindera benzoin	Laureae	MH220730	152478
Lindera chunii	Laureae	LAU00080	152635
Lindera communis	Laureae	MH220731	152778
Lindera fragrans	Laureae	LAU00088	152766
Lindera glauca	Laureae	MF188124	152780
Lindera glauca	Laureae	MH220732	152710
Lindera glauca	Laureae	NC035953	152780
Lindera latifolia	Laureae	MH220733	152779
Lindera limprichtii	Laureae	LAU00081	152696
Lindera megaphylla	Laureae	MH220734	152711
Lindera metcalfiana	Laureae	MH220735	152966
Lindera nacusua	Laureae	MH220736	152211
Lindera obtusiloba	Laureae	LAU00083	152772
Lindera obtusiloba	Laureae	MH220737	152773
Lindera pulcherrima	Laureae	LAU00082	152687
Lindera robusta	Laureae	MH220738	152852
Lindera supracostata	Laureae	LAU00084	152681
Lindera thomsonii	Laureae	LAU00086	152627
Lindera thomsonii	Laureae	LAU00107	152627
Lindera thomsonii var. vernayana	Laureae	LAU00087	152714
Litsea glutinosa	Laureae	KU382356	152618
Litsea glutinosa	Laureae	LAU00058	152721
Litsea monopetala	Laureae	LAU00063	152652
Neolitsea chui	Laureae	LAU00070	152727
Neolitsea oblongifolia	Laureae	LAU00071	152747
Neolitsea sericea	Laureae	MF939341	152442
Parasassafras confertiflorum	Laureae	MH729378	152555
Neocinnamomum mekongense	Neocinnamomum clade	MF686120	150842
Alseodaphne semecarpifolia	Perseeae	NC037491	153051
Machilus yunnanensis	Perseeae	KT348516	152622
Persea americana	Perseeae	KX437771	152723
Phoebe bournei	Perseeae	KY346512	152853
Sassafras tzumu	Cinnamomeae	MF939339	151798
Note: Accession number starting with 'LAU' were downloaded form LCGDB, others were from GenBank.
