# Supplementary material for: Conflicting phylogenetic signals in plastomes of the tribe Laureae (Lauraceae)
Source: PeerJ. 2020 Oct 15;8:e10155. doi: 10.7717/peerj.10155 (PMC7568859; doi:10.7717/peerj.10155)
Supplement: Table S2 [file peerj-08-10155-s002.xlsx]

## Sheet: Sheet1
Category for genes	Group of genes	Name of genes
Photosynthesis-related genes	Rubisco	rbcL
	Photosystem I	psaA, psaB, psaC, psaI, psaJ
	Assembly/stability of photosystem I	ycf3**, ycf4
	Photosystem II	psbA, psbB, psbC, psbD, psbE, psbF, psbH, psbI, psbJ, psbK, psbL, psbM, psbN, psbT, lhbA
	ATP synthase	atpA, atpB, atpE, atpF*, atpH, atpI
	Cytochrome b/f complex	petA, petB*, petD*, petG, petL, petN
	Cytochrome c synthesis	ccsA
	NADPH dehydrogenase	ndhA*, ndhB*, ndhC, ndhD, ndhE, ndhF, ndhG, ndhH,, ndhI, ndhJ, ndhK
Transcription and translation-related genes	Transcription	rpoA, rpoB, rpoC1*, rpoC2
	Ribosomal proteins	rps2, rps3, rps4, rps7, rps8, rps11, rps12*, rps14, rps15, rps16*, rps18, rps19, rpl2*, rpl14, rpl16*, rpl20, rpl23, rpl32, rpl33, rpl36
	translation initiation factor	infA
RNA genes	Ribosomal RNA	rrn4.5, rrn5, rrn16, rrn23
	Transfer RNA	trnA-UGC*, trnC-GCA, trnD-GUC, trnE-UUC, trnF-GAA, trnG-UCC, trnG-UCC*, trnH-GUG, trnI-CAU, trnI-GAU*, trnK-UUU*, trnL-CAA, trnL-UAA*, trnL-UAG, trnfM-CAU, trnM-CAU, trnN-GUU, trnP-UGG, trnQ-UUG, trnR-ACG, trnR-UCU, trnS-GCU, trnS-GGA, trnS-UGA, trnT-GGU, trnT-UGU, trnV-GAC, trnV-UAC*, trnW-CCA, trnY-GUA
Other genes	RNA processing	matK
	Carbon metabolism	cemA
	Fatty acid synthesis	accD
	Proteolysis	clpP**
Genes of unknown function	conserved reading frames	ycf1, ycf2
Note: one and two asterisks incicated one- and two-intron containing genes, respectively.
