# Supplementary material for: Conflicting phylogenetic signals in plastomes of the tribe Laureae (Lauraceae)
Source: PeerJ. 2020 Oct 15;8:e10155. doi: 10.7717/peerj.10155 (PMC7568859; doi:10.7717/peerj.10155)
Supplement: Table S3 [file peerj-08-10155-s003.xlsx]

## Sheet: Sheet1
Specified stripping threshold	Topology	Bootstrap value (%)
No gaps included	(I, II)	90
0.02	(I, II)	89
0.1	(I, II)	83
0.2	(I, II)	80
0.5	(I, II)	83
0.75	(I, II)	86
all gaps included (Fig. 2)	(I, II)	92
Note: (I, II) indicates sister relationship of subclade I and subclade II.
