# Supplementary material for: Conflicting phylogenetic signals in plastomes of the tribe Laureae (Lauraceae)
Source: PeerJ. 2020 Oct 15;8:e10155. doi: 10.7717/peerj.10155 (PMC7568859; doi:10.7717/peerj.10155)
Supplement: Table S4 — Δ np, difference of number of parameters; ΔlnL, log likelihood difference; LRTs, Likelihood Ratio Tests. The names of 27 genes with significantly positively selected sites were in bold. [file peerj-08-10155-s004.xlsx]

## Sheet: p
Genes	M3 vs M0		M2a vs M1a		M8 vs M7		LRTs (p value)			Positively selected codon sites (BEB)
	Δnp	2*|ΔlnL|	Δnp	2*|ΔlnL|	Δnp	2*|ΔlnL|	M3 vs M0	M2a vs M1a	M8 vs M7	M2a	M8
accD	4	64.4937	2	11.5767	2	13.0626	3.29e-13	0.00306309	0.00145709	4 18 43 116 169 251	4 18 20 43 84 87 116 169 251 316 378 384 408
atpA	4	30.8145	2	4.49897	2	7.42582	3.34e-06	0.105454	0.0244064	216 228 264 308 425 429 447 471	216 228 264 308 425 429 447 471
atpB	4	31.1535	2	2.19765	2	3.80339	2.85e-06	0.333262	0.149315	17 19 146 308 427 492	17 19 118 146 308 427 492
atpE	4	0.710602	2	0	2	6e-06	0.950015	1	0.999997	59	59
atpF	4	32.9072	2	5.68237	2	6.70587	1.25e-06	0.0583564	0.0349815	108 116 174	9 75 77 108 116 130 174 178
atpH	4	0.013762	2	0.000852	2	0.000852	0.999976	0.999574	0.999574
atpI	4	9.71643	2	1.53737	2	2.32733	0.0454852	0.463622	0.312339	13 32 62	13 32 62
ccsA	4	82.4693	2	11.9097	2	17.4016	5.22e-17	0.0025932	0.00016645	31 39 66 92 94 97 168 173 177 190 270 273	31 39 44 66 92 94 97 168 173 177 181 190 270 273
cemA	4	20.1566	2	2.95319	2	3.37943	0.000465072	0.228414	0.184572	108 208	2 96 108 109 177 208
clpP	4	11.4978	2	5.11366	2	6.32072	0.0215041	0.0775501	0.0424106	38 122 134 136	38 122 134 136
infA	4	27.9079	2	21.2401	2	13.3365	1.3e-05	2.44e-05	0.00127062	6	6
lhbA	4	0	2	0.000344	2	0.000468	1	0.999828	0.999766
matK	4	75.3177	2	17.6614	2	21.3825	1.71e-15	0.000146173	2.27e-05	43 121 193 196 199 240 249 265 267 280 283 310 316 342 360 365 423 427 479	43 98 121 193 196 199 240 249 265 267 280 283 310 316 331 342 360 365 423 427 479
ndhA	4	44.6321	2	6.39094	2	6.63625	4.74e-09	0.0409473	0.0362206	24 57 177 281 287 321	24 57 100 177 281 287 293 298 321
ndhB	4	3.99464	2	1.44134	2	1.48324	0.406732	0.486427	0.476341	35	1 22 35 173 237 308
ndhC	4	28.2587	2	11.317	2	11.3779	1.11e-05	0.00348771	0.00338316	5 8 98 108	5 8 98 108
ndhD	4	23.0424	2	1.60663	2	4.56899	0.000124178	0.447842	0.101825	35 38 98 126 424	35 38 91 98 126 236 424 463
ndhE	4	10.6426	2	0.010086	2	0.000142	0.0308887	0.99497	0.999929	43 78	43 78
ndhF	4	251.572	2	73.8002	2	87.3514	2.99e-53	9.43e-17	1.08e-19	87 505 507 519 580 621 633 646 728 729 730	87 465 484 505 507 512 519 580 621 630 633 636 639 642 646 728 729 730
ndhG	4	8.03919	2	0	2	0.251416	0.090153	1	0.881872		2 32 139
ndhH	4	17.4798	2	0.00067	2	8e-06	0.00155906	0.999665	0.999996	3 5 43 299 318	3 5 43 186 274 299 305 318
ndhI	4	11.6432	2	0.000278	2	0.000312	0.0202114	0.999861	0.999844	151 159	4 151 159
ndhJ	4	0	2	0.000172	2	0.000286	1	0.999914	0.999857
ndhK	4	37.9386	2	9.33971	2	10.0544	1.15e-07	0.00937365	0.00655713	18 48 54 209 280	18 48 54 209 280
petA	4	26.698	2	4.15392	2	5.52316	2.29e-05	0.125311	0.0631917	6 8 162 211	6 8 12 101 162 210 211
petB	4	13.6584	2	1.03269	2	4.35961	0.00846889	0.596698	0.113064	204	204
petD	4	21.1253	2	0.200352	2	0.232236	0.000299055	0.904678	0.89037	3 139	3 139
petG	4	1.22142	2	0.000352	2	1.21574	0.87456	0.999824	0.544508
petL	4	2.8e-05	2	6e-05	2	1.42774	1	0.99997	0.489745
petN	4	0.005148	2	0.001506	2	0.000308	0.999997	0.999247	0.999846
psaA	4	48.3934	2	3.8431	2	6.30446	7.81e-10	0.14638	0.0427567	13 144 152 209 258 271 274	13 144 152 209 258 271 274 379
psaB	4	77.4692	2	12.6239	2	4.92523	5.98e-16	0.00181451	0.085212	639	204 217 230 240 246 247 281 284 329 481 500 639 658
psaC	4	0.407374	2	0	2	1.24126	0.981869	1	0.537606
psaI	4	1.44822	2	0.742664	2	0.890134	0.835773	0.689815	0.640781	4	4
psaJ	4	0	2	4.6e-05	2	7.14245	1	0.999977	0.0281213
psbA	4	82.0037	2	14.9438	2	28.1088	6.55e-17	0.000568847	7.87e-07	155 235	155 235
psbB	4	16.3183	2	0	2	3.4e-05	0.00262049	1	0.999983	180 290 291 293 494 498 507	180 290 291 293 494 498 507
psbC	4	13.0585	2	2.33013	2	4.63256	0.0109935	0.311903	0.09864	284	284
psbD	4	3.28944	2	0	2	0.000484	0.510606	1	0.999758	241	241
psbE	4	4.24778	2	0.000106	2	0.19485	0.37351	0.999947	0.90717	72	72
psbF	4	14.4516	2	7.08496	2	6.15764	0.00598485	0.0289414	0.0460134	26	26
psbH	4	1.03039	2	0	2	4.2e-05	0.905153	1	0.999979
psbI	4	0.00732	2	0.000432	2	0.0005	0.999993	0.999784	0.99975
psbJ	4	2.53489	2	0	2	6e-06	0.638399	1	0.999997
psbK	4	12.1689	2	7.9674	2	8.10165	0.0161382	0.0186167	0.017408	18	5 18
psbL	4	6.77954	2	3.10963	2	3.13448	0.148007	0.211229	0.20862	5 14	5 14
psbM	4	0.009924	2	0.000472	2	0.000784	0.999988	0.999764	0.999608
psbN	4	0.003718	2	0.000292	2	0.000292	0.999998	0.999854	0.999854
psbT	4	2.8e-05	2	0.000154	2	0.00017	1	0.999923	0.999915
rbcL	4	237.644	2	45.7976	2	47.8516	2.98e-50	1.14e-10	4.07e-11	28 32 33 95 97 219 225 228 279 326 375 407 424 449 470	28 32 33 95 97 142 192 219 225 228 279 326 328 375 407 424 449 461 470
rpl14	4	1.70408	2	0.49493	2	2.09932	0.789977	0.780778	0.350056	7	7
rpl16	4	126.533	2	69.9593	2	73.2237	2.15e-26	6.43e-16	1.26e-16	119 123 134	119 123 134
rpl2	4	34.9069	2	1.84553	2	2.64024	4.85e-07	0.397419	0.267103	20 22 34 129	17 20 22 34 86 129 234
rpl20	4	0	2	0.002388	2	0.001922	1	0.998807	0.999039		88
rpl32	4	13.6735	2	0	2	2e-06	0.0084136	1	0.999999
rpl33	4	0	2	8e-06	2	1.2e-05	1	0.999996	0.999994
rpl36	4	5.84473	2	1.57875	2	1.72627	0.211048	0.454129	0.421837	7	7
rpoA	4	84.5553	2	18.9048	2	19.492	1.89e-17	7.85e-05	5.85e-05	115 161 240 243 262 272	16 77 115 150 161 216 240 243 262 272
rpoB	4	101.376	2	16.7251	2	21.1031	5.01e-21	0.000233447	2.62e-05	33 52 80 91 102 200 227 327 345 559 586 615 793 827 992 1056	24 33 52 80 91 102 200 227 327 345 455 559 586 614 615 793 827 918 992 1056
rpoC1	4	60.1367	2	1.24824	2	2.44416	2.72e-12	0.535733	0.294616	25 33 79 206 209 429 560 561 582 589 649 671	25 33 74 79 113 206 209 212 248 429 469 560 561 563 570 572 580 582 587 589 639 649 671
rpoC2	4	231.953	2	63.5543	2	70.5175	5.01e-49	1.58e-14	4.87e-16	80 256 430 507 512 534 557 595 621 637 697 752 840 889 903 966 1010 1012 1031 1351 1356	69 80 231 256 368 430 507 512 534 535 547 557 595 621 637 659 697 752 794 840 889 903 937 945 951 959 960 966 1010 1011 1012 1031 1039 1316 1351 1356
rps11	4	9.51894	2	0.10074	2	0.718414	0.0493595	0.950878	0.69823	15 80	15 80
rps12	4	0.000206	2	0.00033	2	0.000328	1	0.999835	0.999836
rps14	4	3.71238	2	0	2	2e-06	0.446328	1	0.999999
rps15	4	5.25671	2	0	2	0.00012	0.261956	1	0.99994
rps16	4	5.6907	2	0	2	2e-06	0.223468	1	0.999999		73 80
rps18	4	37.9541	2	23.3288	2	23.728	1.15e-07	8.59e-06	7.04e-06	4	4
rps19	4	9.55847	2	0	2	0.007972	0.0485595	1	0.996022		17 20 69 86
rps2	4	31.5593	2	4.32535	2	5.93332	2.35e-06	0.115017	0.0514748	70 146 159 215 228	70 130 146 159 200 215 228
rps3	4	15.8886	2	0	2	0.394848	0.00317234	1	0.820843	31	31 95 104 107 208
rps4	4	18.0073	2	6.74835	2	8.64622	0.00123005	0.0342464	0.0132586	36 157 167	36 138 157 167
rps7	4	0	2	0.000252	2	3.2e-05	1	0.999874	0.999984
rps8	4	10.5379	2	1.35862	2	1.91927	0.0322794	0.506967	0.383033	7 41 55	7 41 55
ycf1	4	590.208	2	150.867	2	165.987	2.04e-126	1.74e-33	9.04e-37	291 396 419 422 461 489 491 496 500 507 570 665 667 689 739 834 837 859 872 899 905 934 1000 1018 1066 1069 1070 1078 1113 1149 1187 1225 1227 1259 1336 1353 1364 1386 1417 1464 1497	291 309 396 419 422 461 475 489 491 496 500 507 525 536 570 665 667 689 739 834 837 859 872 885 887 899 905 934 968 1000 1018 1066 1069 1070 1078 1113 1149 1187 1225 1227 1259 1336 1353 1364 1386 1417 1446 1464 1497 1635
ycf2	4	151.8	2	35.2414	2	36.0821	8.37e-32	2.23e-08	1.46e-08	14 24 26 35 108 117 167 170 179 199 266 300 316 318 369 383 394 413 441 467 471 478 641 644 647 648 668 783 1335 1571	12 14 24 26 28 33 35 51 71 79 108 117 152 167 170 179 199 266 273 292 300 316 318 369 373 383 394 413 441 467 471 478 503 545 550 632 641 644 646 647 648 650 668 783 1192 1335 1419 1571
ycf3	4	89.9752	2	45.9209	2	48.8033	1.33e-18	1.07e-10	2.53e-11	119	119
ycf4	4	93.1595	2	45.2365	2	48.4112	2.81e-19	1.5e-10	3.07e-11	58 149 161	58 149 161
