# Supplementary material for: Conflicting phylogenetic signals in plastomes of the tribe Laureae (Lauraceae)
Source: PeerJ. 2020 Oct 15;8:e10155. doi: 10.7717/peerj.10155 (PMC7568859; doi:10.7717/peerj.10155)
Supplement: Table S5 [file peerj-08-10155-s005.xlsx]

## Sheet: Sheet1
Loci	ΔlnL (T1-T2)	ΔlnL (T1-T3)	ΔlnL (T2-T3)
accD	-0.235579	-0.297961	-0.062382
accD-psaI	0.085895	0.106523	0.020628
accD-rbcL	0.021144	-0.024074	-0.045218
atpA-atpF	-0.06208	-0.079615	-0.017535
atpA	0.032744	0.032694	-5e-05
atpA-trnR	0.044177	0.044825	0.000648
atpB	0.0148	0.017243	0.002443
atpB-rbcL	0.014523	0.033945	0.019422
atpE	0.026909	0.027631	0.000722
atpE-trnM	-0.031255	-0.031482	-0.000227
atpF intron	-0.05855	-0.080559	-0.022009
atpF-atpH	-0.209475	-0.238094	-0.028619
atpF	-0.029413	-0.079441	-0.050028
atpH-atpI	0.138313	0.09925	-0.039063
atpH	0.012279	0.017127	0.004848
atpI	-0.020559	-0.020627	-6.8e-05
atpI-rps2	-0.02962	-0.036905	-0.007285
ccsA	-0.089348	-0.146003	-0.056655
ccsA-ndhD	0.108872	0.061966	-0.046906
ccsA-trnL	-0.303451	-0.251613	0.051838
cemA	0.115488	0.125639	0.010151
cemA-petA	-0.012555	-0.04504	-0.032485
cemA-ycf4	0.032311	-0.004429	-0.03674
clpP intron1	-0.086071	-1.48432	-1.39825
clpP-psbB	0.36492	0.376687	0.011767
clpP intron2	-0.179631	-0.171137	0.008494
clpP-rps12	0.01881	0.02608	0.00727
clpP	-0.040803	-0.095458	-0.054655
infA	0.033511	0.035403	0.001892
infA-rpl36	0.002383	-0.02451	-0.026893
infA-rps8	0.008484	0.009092	0.000608
lhbA	0.000334	0.003755	0.003421
lhbA-trnG	-0.036282	-0.028269	0.008013
lhbA-trnS	-0.055805	-0.048562	0.007243
matK	0.090412	0.077273	-0.013139
matK-trnK_exon1	-0.009117	-0.035578	-0.026461
matK-trnK_exon2	0.229449	0.227871	-0.001578
ndhA intron	4.94235	4.91008	-0.032268
ndhA-ndhH	-9.9e-05	-8.9e-05	1e-05
ndhA-ndhI	0.071652	0.068211	-0.003441
ndhA	-0.055472	-0.073455	-0.017983
ndhB intron	0.026782	0.038114	0.011332
ndhB-rps7	0.011762	0.018067	0.006305
ndhB-trnL	0.017352	0.01199	-0.005362
ndhB	0.027848	0.050482	0.022634
ndhC	-0.010682	-0.010499	0.000183
ndhC-trnV	-0.20316	-0.25079	-0.04763
ndhD	-0.280558	-0.31103	-0.030472
ndhD-psaC	-0.008534	-0.001362	0.007172
ndhE	-0.030194	-0.033132	-0.002938
ndhE-ndhG	0.090553	0.081221	-0.009332
ndhE-psaC	0.074989	0.082652	0.007663
ndhF	-0.336984	-0.514977	-0.177993
ndhF-rpl32	-0.315471	-0.197724	0.117747
ndhF-trnN	-0.455819	-0.482892	-0.027073
ndhG	-7.3e-05	-0.000766	-0.000693
ndhG-ndhI	0.112028	0.092668	-0.01936
ndhH	-0.104784	-0.213959	-0.109175
ndhH-rps15	0.003118	0.013663	0.010545
ndhI	-0.038829	-0.044514	-0.005685
ndhJ	-0.007698	-0.002873	0.004825
ndhJ-ndhK	0.031351	0.031786	0.000435
ndhJ-trnF	-0.122938	-0.103563	0.019375
ndhK	-0.032408	-0.042975	-0.010567
petA	-0.018116	-0.009146	0.00897
petA-psbJ	0.787585	0.810053	0.022468
petB intron	-0.136534	-0.119992	0.016542
petB-psbH	0.008438	0.009565	0.001127
petB-petD	-0.01983	-0.016723	0.003107
petB	-0.030853	-0.021466	0.009387
petD intron	-0.034924	-0.013795	0.021129
petD-rpoA	0.006866	0.007895	0.001029
petD	-0.057344	-0.070155	-0.012811
petG	0.00439	0.002087	-0.002303
petG-petL	-0.015544	-0.006498	0.009046
petG-trnW	0.017668	0.024344	0.006676
petL	-0.006488	-0.008008	-0.00152
petL-psbE	-0.208516	-0.19493	0.013586
petN	-0.002154	-0.004983	-0.002829
petN-psbM	2.57051	2.54195	-0.028557
petN-trnC	-0.180858	-0.213246	-0.032388
psaA	0.022158	-0.008611	-0.030769
psaA-psaB	-0.000325	0.000269	0.000594
psaA-ycf3	-0.096772	-0.137845	-0.041073
psaB	-2.79329	-0.095119	2.69817
psaB-rps14	-0.01685	-0.019406	-0.002556
psaC	-0.022699	-0.030559	-0.00786
psaI	0.002085	0.002902	0.000817
psaI-ycf4	0.009465	0.028829	0.019364
psaJ	-0.005095	-0.004483	0.000612
psaJ-rpl33	4.21481	4.13444	-0.080377
psaJ-trnP	0.008358	-0.027933	-0.036291
psbA	-0.073894	-0.10952	-0.035626
psbA-trnH	0.101663	0.233539	0.131876
psbA-trnK	-0.064747	-0.07772	-0.012973
psbB	-0.125814	-0.168663	-0.042849
psbB-psbT	-0.02557	-0.016892	0.008678
psbC	0.014691	0.024033	0.009342
psbC-trnS	-0.106629	-0.097548	0.009081
psbD	-0.021623	-0.005083	0.01654
psbD-trnT	-0.157689	-0.164493	-0.006804
psbE	-0.009424	-0.020605	-0.011181
psbE-psbF	0.000427	0.000613	0.000186
psbF	0.009571	0.011593	0.002022
psbF-psbL	0.00104	0.001148	0.000108
psbH	0.004399	0.001035	-0.003364
psbH-psbN	-0.007072	-0.011514	-0.004442
psbI	0.04626	0.039969	-0.006291
psbI-psbK	-0.145984	-0.16075	-0.014766
psbI-trnS	-0.007772	-0.005697	0.002075
psbJ	-0.008237	-0.008282	-4.5e-05
psbJ-psbL	0.020232	0.0163	-0.003932
psbK	0.007722	0.011827	0.004105
psbK-trnQ	-0.055482	-0.064985	-0.009503
psbL	-0.003877	-0.003396	0.000481
psbM	-0.00596	-0.008333	-0.002373
psbM-trnD	-0.372473	-0.343952	0.028521
psbN	-0.00469	-0.006436	-0.001746
psbN-psbT	0.001717	0.001338	-0.000379
psbT	0.000547	0.000295	-0.000252
rbcL	0.008506	0.021757	0.013251
rpl14	-0.032114	-0.045934	-0.01382
rpl14-rpl16	-0.012695	-0.015186	-0.002491
rpl14-rps8	0.00319	0.000602	-0.002588
rpl16 intron	-0.065374	-0.079363	-0.013989
rpl16-rps3	-0.016803	-0.001976	0.014827
rpl16	0.055934	0.060673	0.004739
rpl20	0.001795	-0.007355	-0.00915
rpl20-rps12	0.03339	-0.025371	-0.058761
rpl20-rps18	0.03977	0.04295	0.00318
rpl23	-0.042686	-0.036064	0.006622
rpl23-trnI	-0.001336	-0.001287	4.9e-05
rpl2-rpl23	3.50069	3.44743	-0.053254
rpl2-rpl2	0.001245	0.018942	0.017697
rpl2-rps19	-0.053085	-0.078888	-0.025803
rpl2	-0.078145	-0.112741	-0.034596
rpl32	0.000102	-0.002804	-0.002906
rpl32-trnL	0.726282	0.490834	-0.235448
rpl33	0.002887	0.00346	0.000573
rpl33-rps18	0.018191	0.019138	0.000947
rpl36	-0.007592	-0.009336	-0.001744
rpl36-rps11	0.050466	0.050428	-3.8e-05
rpoA	0.010128	-0.002687	-0.012815
rpoA-rps11	0.021331	0.024429	0.003098
rpoB	0.07031	0.054226	-0.016084
rpoB-rpoC1	0.00082	0.001168	0.000348
rpoB-trnC	-0.218066	-0.2007	0.017366
rpoC1 intron	8.60788	8.4941	-0.113777
rpoC1-rpoC2	0.072071	0.072367	0.000296
rpoC1	-0.149833	-0.167314	-0.017481
rpoC2	-0.384142	-0.450262	-0.06612
rpoC2-rps2	-0.049665	-0.074384	-0.024719
rps11	0.003859	0.002494	-0.001365
rps12 intron	0.025339	0.032826	0.007487
rps12-trnV	0.301176	0.302863	0.001687
rps12-rps7	0.002314	0.00319	0.000876
rps12	0.006802	0.015702	0.0089
rps14	-0.015528	-0.013429	0.002099
rps14-trnfM	0.006097	0.003928	-0.002169
rps15	-0.001444	-0.007716	-0.006272
rps15-ycf1	0.080787	0.035531	-0.045256
rps16-rps16	-0.029939	-0.063269	-0.03333
rps16-trnQ	-0.143645	-0.180821	-0.037176
rps16-trnK	-0.254964	-0.342847	-0.087883
rps16	-0.019817	-0.037966	-0.018149
rps18	-0.004572	-0.002277	0.002295
rps19	0.012677	0.014309	0.001632
rps19-rps3	-0.037625	-0.055589	-0.017964
rps2	-0.087233	-0.121251	-0.034018
rps3	0.032872	0.021783	-0.011089
rps4	-0.000217	-0.006358	-0.006141
rps4-trnS	-0.175892	-0.187826	-0.011934
rps4-trnT	-0.035733	-0.325834	-0.290101
rps7	0.021114	0.026644	0.00553
rps8	0.009195	0.002474	-0.006721
rrn16	0.035377	0.063911	0.028534
rrn16-trnI	-0.004119	-0.001813	0.002306
rrn16-trnV	0.010497	0.013943	0.003446
rrn23	0.063968	0.098212	0.034244
rrn23-rrn4.5	0.004931	0.006869	0.001938
rrn23-trnA	0.002772	0.00692	0.004148
rrn4.5	0.002885	0.004995	0.00211
rrn4.5-rrn5	0.015158	0.02165	0.006492
rrn5	0.001183	0.00139	0.000207
rrn5-trnR	0.003279	0.004559	0.00128
trnA intron	0.012485	0.025705	0.01322
trnA-trnI	0.001572	0.002788	0.001216
trnA-UGC	0.000391	0.001897	0.001506
trnC-GCA	0.001487	0.00198	0.000493
trnD-GUC	0.031219	0.035499	0.00428
trnD-trnY	0.089008	0.084812	-0.004196
trnE-UUC	0.001147	0.002617	0.00147
trnE-trnT	-0.004625	0.001852	0.006477
trnE-trnY	-0.000355	0.005095	0.00545
trnF-GAA	-0.00278	-0.000555	0.002225
trnF-trnL	-0.009107	-0.013548	-0.004441
trnfM-CAU	-0.002386	0.001601	0.003987
trnG-UCC	0.001647	0.003021	0.001374
trnG intron	0.262013	0.275849	0.013836
trnG-trnS	0.002572	-0.089099	-0.091671
trnG-trnR	-0.058599	-0.03935	0.019249
trnG-UCC	0.00191	0.003238	0.001328
trnG-trnfM	6.42707	6.37548	-0.051592
trnH-GUG	-0.005888	-0.002669	0.003219
trnH-trnL	-0.015677	0.077346	0.093023
trnI-CAU	-0.003791	-0.003961	-0.00017
trnI-ycf2	0.005479	-0.017147	-0.022626
trnI-trnI	0.010109	0.021878	0.011769
trnI-GAU	0.013726	0.016182	0.002456
trnK-UUU	0.000616	-0.000372	-0.000988
trnL-CAA	0.002003	0.003657	0.001654
trnL-ycf2	0.015814	0.022575	0.006761
trnL-trnL	-0.045199	-0.050545	-0.005346
trnL-trnT	0.049168	0.083041	0.033873
trnL-UAA	-0.003571	-0.002269	0.001302
trnL-UAG	0.005985	0.007043	0.001058
trnM-CAU	0.001044	0.001051	7e-06
trnM-trnV	0.042729	0.036243	-0.006486
trnN-GUU	-0.000374	0.001214	0.001588
trnN-trnR	0.066821	0.017629	-0.049192
trnN-ycf1	0.014577	0.017728	0.003151
trnP-UGG	-0.002235	-0.001393	0.000842
trnP-trnW	-0.008307	-0.015343	-0.007036
trnQ-UUG	-0.003402	-0.0029	0.000502
trnR-ACG	0.002227	0.003753	0.001526
trnR-UCU	0.039824	0.042552	0.002728
trnS-GCU	-0.001702	-0.001311	0.000391
trnS-GGA	0.000311	0.002077	0.001766
trnS-ycf3	-3.73232	-0.212906	3.51942
trnS-UGA	-0.000562	0.000711	0.001273
trnT-GGU	-0.002639	-0.003758	-0.001119
trnT-UGU	0.001198	0.002614	0.001416
trnV-GAC	0.001109	0.001717	0.000608
trnV-trnV	0.045142	0.045519	0.000377
trnV-UAC	0.001124	0.001484	0.00036
trnW-CCA	-0.036452	-0.039233	-0.002781
trnY-GUA	-0.003044	-0.03087	-0.027826
ycf1	-0.979641	-0.985116	-0.005475
ycf2	-3.75841	-0.978549	2.77987
ycf3 intron1	-0.017603	0.010112	0.027715
ycf3 intron2	-0.1083	-0.099877	0.008423
ycf3	0.002324	0.010027	0.007703
ycf4	-0.048201	0.032272	0.080473
