# Supplementary material for: Conflicting phylogenetic signals in plastomes of the tribe Laureae (Lauraceae)
Source: PeerJ. 2020 Oct 15;8:e10155. doi: 10.7717/peerj.10155 (PMC7568859; doi:10.7717/peerj.10155)
Supplement: Table S6 — deltaL: difference from the maximum-likelihood (ML) topology. p-KH: p-value of Kishino-Hasegawa (KH) test. p-SH: p-value of Shimodaira-Hasegawa (SH) test. p-AU: p-value of approximately-unbiased (AU) test. [file peerj-08-10155-s006.xlsx]

## Sheet: Sheet1
Tree	logL	deltaL	p-KH	p-SH	p-AU
suboptimal tree 1 (T1)	-282906	0	0.894	1	0.928
suboptimal tree 2 (T2)	-282917	11.521	0.106	0.106	0.101
suboptimal tree 3 (T3)	-282920	14.107	0.0497	0.0505	0.022
